# Supplementary figures and images for: Combination Small Molecule MEK and PI3K Inhibition Enhances Uveal Melanoma Cell Death in a Mutant GNAQ- and GNA11 -Dependent Manner
Source: Oxford University Press journal article supplement (doi:10.1158/1078-0432.ccr-11-3227), 2012-06-26

Figure SUP4

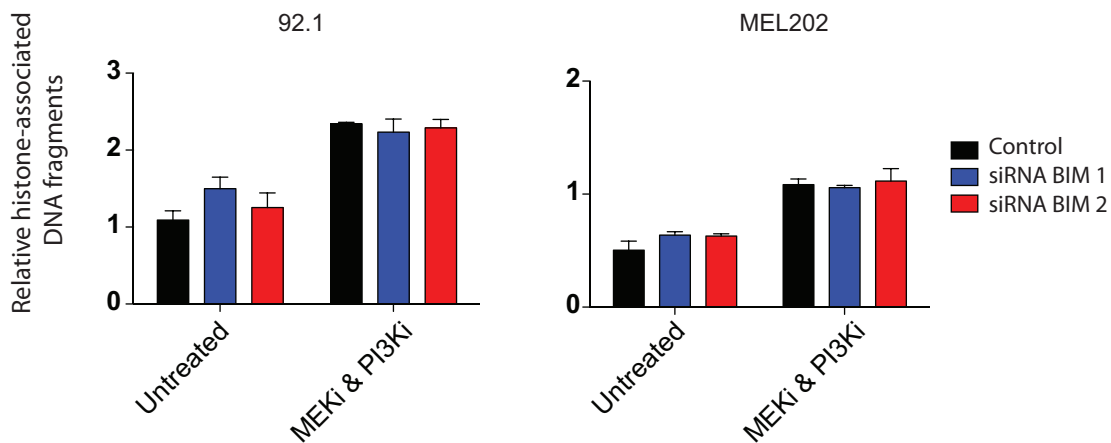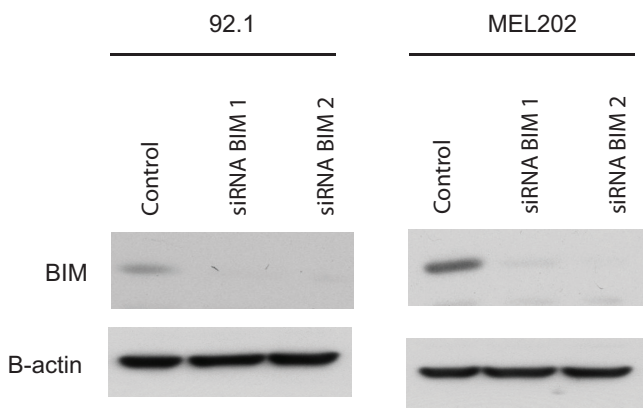

Supplement: 10780432ccr113227-sup-fig4.pdf [file 10780432ccr113227-sup-fig4.pdf]
